# Supplementary material for: Antifungal Efficacy and Biofilm Inhibition of <em>Candida albicans</em> by Tea Tree Oil (<em>Melaleuca alternifolia</em>) in Vietnam: A Comprehensive Study
Source: Preprints.org preprint supplement (doi:10.20944/preprints202409.0422.v1), 2024-09-09
Supplement: Supplementary file 1 [file supplementary]

**TTO essential oil composition analysis results**

**Analytical index:** Analysis of the composition and relative content of compounds in the Tea Tree essential oil sample using GCMS method.

**Results:**

| **TT** | **Rt** | **Components** | **Mass** | **Mass spectrum match** | **Content (%)** |
| --- | --- | --- | --- | --- | --- |
| 1 | 6.86 | α-Thujene | 136 | 926 | 1.20 |
| 2 | 7.08 | 1R-. α.-Pinene | 136 | 941 | 2.41 |
| 3 | 8.86 | . β.-Pinene | 136 | 932 | 0.72 |
| 4 | 10.25 | α-Phellandrene | 136 | 923 | 0.79 |
| 5 | 10.89 | α.-Terpinene | 136 | 902 | 1.51 |
| 6 | 11.32 | β-Cymene | 134 | 933 | 2.36 |
| 7 | 11.52 | D-Limonene | 136 | 932 | 2.43 |
| 8 | 11.64 | Eucalyptol | 154 | 969 | 29.41 |
| 9 | 13.23 | γ-Terpinene | 136 | 963 | 7.92 |
| 10 | 14.95 | .Terpinolene | 136 | 957 | 8.63 |
| 11 | 15.86 | Linalool | 154 | 849 | 1.30 |
| 12 | 20.03 | .4-Terpineol | 154 | 866 | 0.82 |
| 13 | 20.70 | .. α-Terpineol | 154 | 920 | 5.67 |
| 14 | 28.89 | Caryophyllene | 204 | 948 | 5.21 |
| 15 | 29.89 | Humulene | 204 | 912 | 3.32 |
| 16 | 30.55 | Ko xác định | - | - | 0.93 |
| 17 | 30.67 | α-Amorphene | 204 | 911 | 0.84 |
| 18 | 30.83 | β-Eudesmene | 204 | 946 | 2.36 |
| 19 | 30.97 | δ-Selinene | 204 | 887 | 0.92 |
| 20 | 31.08 | α-Selinene | 204 | 929 | 2.48 |
| 21 | 31.41 | β-Cadinene | 204 | 890 | 1.01 |
| 22 | 33.43 | Guaiol | 222 | 917 | 4.69 |
| 23 | 34.07 | .γ-Eudesmol | 222 | 901 | 3.59 |
| 24 | 34.41 | β-Eudesmol | 222 | 907 | 3.28 |
| 25 | 34.46 | α-Eudesmol | 222 | 915 | 4.73 |
| 26 | 34.69 | Bulnesol | 222 | 889 | 1.51 |

Essential oil sample (25 µL) dissolved in 1.0 mL n-hexane. Sample injection: 1.0 µL, split ratio 1:50

GC Agilent 6890N, MS 5973 inert. HP5-MS column, He pressure at the top of the column 9.3 psi

Temperature program for the sample: 50 oC held for 2 minutes then increased by 2 oC/min to 80 oC, increased by 5 oC/min to 150 oC, continued to increase by 3 oC/min to 180 oC, increased by 20 oC/min to 300 oC held for 5 minutes.
